# Supplementary material for: Lyotropic liquid crystals as templates for advanced materials
Source: Royal Society of Chemistry journal article supplement (doi:10.1039/d1ta02748d), 2021-01-01
Supplement: d1ta02748d1.pdf [file d1ta02748d1.pdf]

## Supporting Information

# Lyotropic liquid crystals as templates for advanced materials

Younes Saadat <sup>a,b</sup>, Omar Q. Imran <sup>c,d</sup>, Chinedum O. Osuji <sup>d\*</sup>, Reza Foudazi <sup>a,b†</sup>

<sup>d</sup> *Department of Chemical and Materials Engineering, New Mexico State University, Las Cruces, NM 88003, USA*

<sup>b</sup> *School of Chemical, Biological and Materials Engineering, University of Oklahoma, Norman 73019, OK, USA*

<sup>c</sup> *Department of Chemical and Environmental Engineering, Yale University, New Haven, CT 06520, USA*

<sup>d</sup> *Department of Chemical and Biomolecular Engineering, University of Pennsylvania, Philadelphia, Pennsylvania 19104, USA*

---

\* Corresponding author. Email: [cosuji@seas.upenn.edu](mailto:cosuji@seas.upenn.edu).

† Corresponding author. Email: [rfoudazi@ou.edu](mailto:rfoudazi@ou.edu).

Table S1. Amphiphiles, (co)monomers, cross-linkers and initiators used in LLC templating.

| No.    | Name/Chemical Formula                                                                                                                                      |
|--------|------------------------------------------------------------------------------------------------------------------------------------------------------------|
| P-A-1  | Allyl dodecyldimethylammonium bromide                                                                                                                      |
| P-A-2  | Allyl didodecylmethylammonium bromide                                                                                                                      |
| P-A-3  | $\omega$ -Undecenyltrimethylammonium bromide                                                                                                               |
| P-A-4  | (11-Methacryloylundecyl)trimethylammonium bromide                                                                                                          |
| P-A-5  | 2-(Methacryloyloxy)ethyl dodecyl dimethyl ammonium bromide                                                                                                 |
| P-A-6  | 2-(Methacryloyloxy)ethyl tetradecyl dimethyl ammonium bromide                                                                                              |
| P-A-7  | 2-(Methacryloyloxy)ethyl hexadecyl dimethyl ammonium bromide                                                                                               |
| P-A-8  | Dodecyldimethylammoniumethylmethacrylate bromide                                                                                                           |
| P-A-9  | 2-(Acryloyloxy)ethyl dodecyl dimethyl ammonium bromide                                                                                                     |
| P-A-10 | (11-Acryloyloxy-undecyl)-dimethyl-[2-(methacryloyloxy)-ethyl]-ammonium bromide                                                                             |
| P-A-11 | <i>N,N</i> -Di(11-acryloyloxy-undecyl)- <i>N,N,N,N</i> -tetramethyl-hexane-1,6-diammonium dibromide                                                        |
| P-A-12 | C <sub>59</sub> H <sub>66</sub> NO <sub>2</sub> <sup>2+</sup> Br <sup>-</sup>                                                                              |
| P-A-13 | C <sub>69</sub> H <sub>90</sub> N <sub>3</sub> O <sub>24</sub> <sup>3+</sup> Br <sup>3-</sup>                                                              |
| P-A-14 | C <sub>53</sub> H <sub>74</sub> N <sub>3</sub> O <sub>17</sub> <sup>3+</sup> Br <sup>3-</sup>                                                              |
| P-A-15 | Sodium 10-undecenoate                                                                                                                                      |
| P-A-16 | Zinc 10-undecenoate                                                                                                                                        |
| P-A-17 | Dodecyl ammonium acrylate                                                                                                                                  |
| P-A-18 | Dodecyl ammonium methacrylate                                                                                                                              |
| P-A-19 | <i>mon</i> -isoMeDenPE                                                                                                                                     |
| P-A-20 | <i>bis</i> -isoMeDenPC                                                                                                                                     |
| P-A-21 | C <sub>48</sub> H <sub>84</sub> NO <sub>6</sub> <sup>+</sup> P <sup>-</sup>                                                                                |
| P-A-22 | Hitenol BC-05                                                                                                                                              |
| P-A-23 | C <sub>27</sub> H <sub>44</sub> Na <sup>+</sup> O <sub>2</sub> <sup>-</sup>                                                                                |
| P-A-24 | C <sub>29</sub> H <sub>49</sub> NO <sub>2</sub> Na <sup>+</sup> SO <sub>3</sub> <sup>-</sup>                                                               |
| P-A-25 | C <sub>12</sub> H <sub>14</sub> (CH <sub>2</sub> ) <sub>k</sub> (CH <sub>2</sub> ) <sub>m</sub> Na <sup>+</sup> O <sub>3</sub> <sup>-</sup>                |
| P-A-26 | C <sub>49</sub> H <sub>80</sub> Na <sup>+</sup> O <sub>11</sub> <sup>-</sup>                                                                               |
| P-A-27 | C <sub>19</sub> H <sub>14</sub> (CH <sub>2</sub> ) <sub>3n</sub> Na <sup>+</sup> O <sub>5</sub> <sup>-</sup>                                               |
| P-A-28 | C <sub>52</sub> H <sub>88</sub> NO <sub>13</sub> S <sup>-</sup> Li <sup>+</sup>                                                                            |
| P-A-29 | C <sub>58</sub> H <sub>98</sub> N <sub>2</sub> O <sub>11</sub> <sup>+</sup> BF <sub>4</sub> <sup>-</sup>                                                   |
| P-A-30 | C <sub>58</sub> H <sub>100</sub> N <sub>2</sub> O <sub>11</sub> <sup>+</sup> BF <sub>4</sub> <sup>-</sup>                                                  |
| P-A-31 | C <sub>7</sub> H <sub>14</sub> (CH <sub>2</sub> ) <sub>n</sub> P <sup>+</sup> Br <sup>-</sup>                                                              |
| P-A-32 | C <sub>13</sub> H <sub>22</sub> (CH <sub>2</sub> ) <sub>k</sub> (CH <sub>2</sub> ) <sub>l</sub> P <sub>2</sub> <sup>2+</sup> Br <sub>2</sub> <sup>2-</sup> |
| P-A-33 | C <sub>13</sub> H <sub>22</sub> (CH <sub>2</sub> ) <sub>k</sub> (CH <sub>2</sub> ) <sub>l</sub> N <sub>2</sub> <sup>2+</sup> Br <sub>2</sub> <sup>2-</sup> |
| P-A-34 | TMA-83u                                                                                                                                                    |
| P-A-35 | C <sub>48</sub> H <sub>84</sub> N <sub>4</sub> <sup>2+</sup> Br <sub>2</sub> <sup>2-</sup>                                                                 |
| P-A-36 | 1-(8-(Acryloyloxy)octyl)-3-methylimidazolium Chloride<br>1-(10-(Acryloyloxy)decyl)-3-methylimidazolium Chloride                                            |
| P-A-37 | 1-(10-Thien-3-yl)decyl-3-methylimidazolium nitrate                                                                                                         |
| P-A-38 | 1-Decyl-3-methylimidazolium Acrylate                                                                                                                       |
| P-A-39 | 1-Dodecyl-3-Propargylimidazolium Bromide                                                                                                                   |
| P-A-40 | 3-Decyl-1-vinylimidazolium chloride                                                                                                                        |
| P-A-41 | Nanodiamond-[COC <sub>10</sub> H <sub>20</sub> VIm <sup>+</sup> ][Br <sup>-</sup> ]                                                                        |
| P-A-42 | Quantum-Dot-[SC <sub>10</sub> BrVIm <sup>+</sup> ][Cl <sup>-</sup> ]                                                                                       |
| P-A-43 | C <sub>330</sub> H <sub>528</sub> N <sub>8</sub> O <sub>50</sub> P <sub>3</sub> P <sub>4</sub> <sup>4+</sup> (PF <sub>6</sub> ) <sub>4</sub>               |
| P-A-44 | Monoacylglycerol                                                                                                                                           |
| P-A-45 | 1,2-Diaclylglycerol                                                                                                                                        |
| P-A-46 | Noigen RN-10                                                                                                                                               |
| P-A-47 | $\alpha,\omega$ -hydrophobically modified poly(oxyethylene)                                                                                                |
| P-A-48 | Ether-substituted perfluoroalkyl methacrylic acid                                                                                                          |
| P-A-49 | C <sub>52</sub> H <sub>89</sub> NO <sub>15</sub> S                                                                                                         |
| P-A-50 | C <sub>53</sub> H <sub>89</sub> NO <sub>12</sub>                                                                                                           |
| P-A-51 | C <sub>64</sub> H <sub>103</sub> N <sub>3</sub> O <sub>11</sub>                                                                                            |
| P-A-52 | Poly(ethylene oxide)- <i>b</i> -poly(butadiene)                                                                                                            |
| P-A-53 | MA-PEO-PDMS-PEO-MA                                                                                                                                         |
| P-A-54 | PEO- <i>b</i> -PDMS- <i>b</i> -PEO-cinnamate triblock copolymer                                                                                            |
| P-A-55 | Pluronic diacrylate                                                                                                                                        |
| P-A-56 | 3-(2,4,13-(E,E)-tetradecatrienoyl)- <i>sn</i> -glycerol                                                                                                    |
| A-1    | Didodecyldimethylammonium bromide                                                                                                                          |
| A-2    | Diocetadecyldimethylammonium bromide                                                                                                                       |
| A-3    | Dodecyltrimethylammonium bromide                                                                                                                           |
| A-4    | Tetradecyltrimethylammonium bromide                                                                                                                        |
| A-5    | Cetyltrimethylammonium bromide                                                                                                                             |
| A-6    | Octadecyltrimethylammonium bromide                                                                                                                         |
| A-7    | <i>N,N</i> -dimethyldodecylamine- <i>N</i> -oxide                                                                                                          |
| A-8    | Dimyristoylphosphatidylcholine                                                                                                                             |
| A-9    | 1-Decyl-3-methylimidazolium Chloride                                                                                                                       |
| A-10   | Sodium dodecyl sulfate                                                                                                                                     |
| A-11   | Cetyltrimethylammonium tartrate                                                                                                                            |
| A-12   | Diocetyl sodium sulfosuccinate                                                                                                                             |
| A-13   | Brij 52                                                                                                                                                    |
| A-14   | Brij 56                                                                                                                                                    |
| A-15   | Brij 58                                                                                                                                                    |
| A-16   | Dodecyl poly(ethyleneglycol) ether                                                                                                                         |
| A-17   | PS- <i>b</i> -PEO (SE10/10)                                                                                                                                |
| A-18   | Poly(oxyethylene) oleyl ether                                                                                                                              |
| A-19   | Pluronic                                                                                                                                                   |
| A-20   | Tween 60                                                                                                                                                   |

Polymerizable Amphiphiles

Non-Polymerizable Amphiphiles

Table S1. (cont.)

|                      | No.                                      | Name                                                                |
|----------------------|------------------------------------------|---------------------------------------------------------------------|
| <b>(Co)Monomers</b>  | M-1                                      | Styrene                                                             |
|                      | M-2                                      | Methyl methacrylate                                                 |
|                      | M-3                                      | Methyl acrylate                                                     |
|                      | M-4                                      | <i>n</i> -Butyl acrylate                                            |
|                      | M-5                                      | <i>n</i> -Hexyl acrylate                                            |
|                      | M-6                                      | <i>n</i> -Decyl acrylate                                            |
|                      | M-7                                      | <i>n</i> -Dodecyl methacrylate                                      |
|                      | M-8                                      | Glycidyl methacrylate                                               |
|                      | M-9                                      | Acrylamide                                                          |
|                      | M-10                                     | <i>N</i> -Isopropylacrylamide                                       |
|                      | M-11                                     | <i>N,N</i> -Dimethylacrylamide                                      |
|                      | M-12                                     | 2-(Dimethylamino)ethyl methacrylate                                 |
|                      | M-13                                     | 2-Hydroxyethyl methacrylate                                         |
|                      | M-14                                     | 2-Carboxyethyl acrylate                                             |
|                      | M-15                                     | 2-(Acrylamido)-2-methyl-1-propanesulfonic acid                      |
|                      | M-16                                     | Sodium acrylate                                                     |
|                      | M-17                                     | Acrylic acid                                                        |
|                      | M-18                                     | 2,3-Dihydrothieno[3,4- <i>b</i> ]-1,4-dioxin                        |
|                      | M-19                                     | dimethyldimethoxysilane                                             |
|                      | M-20                                     | 1,6-Hexanediol diacrylate                                           |
|                      | M-21                                     | Ethylene glycol dimethacrylate                                      |
|                      | M-22                                     | 1,6-Hexanediol dimethacrylate                                       |
|                      | M-23                                     | Poly(ethylene glycol) dimethacrylate                                |
|                      | M-24                                     | Poly(ethylene glycol) diacrylate                                    |
|                      | M-25                                     | Ethylxy succinate dimethacrylate                                    |
|                      | M-26                                     | PLA- <i>b</i> -PEG- <i>b</i> -PLA diacrylate                        |
|                      | M-27                                     | PLA- <i>b</i> -PEG- <i>b</i> -PLA dimethacrylate                    |
|                      | M-28                                     | Caprolactone dimethacrylate                                         |
|                      | M-29                                     | Methacrylated poly(dimethylsiloxane)                                |
|                      | M-30                                     | Poly(ethyleneglycol)-poly(lactic acid)-hexamethylene dimethacrylate |
|                      | M-31                                     | 3-Sulfopropyl acrylate                                              |
|                      | M-32                                     | [2-(Acryloyloxy)ethyl]trimethylammonium chloride                    |
|                      | M-33                                     | Silver acrylate                                                     |
|                      | M-34                                     | Phenol/formaldehyde                                                 |
|                      | M-35                                     | 3,9-Dioxidophenanthrene-1,5-dicarboxylate                           |
|                      | M-36                                     | Phloroglucinol                                                      |
|                      | M-37                                     | Resorcinol                                                          |
|                      | M-38                                     | Bisphenol A diglycidyl ether                                        |
|                      | M-39                                     | 1,4-Diphenylbutadiyne                                               |
|                      | M-40                                     | 3-Hexylthiophene                                                    |
|                      | M-41                                     | Aniline                                                             |
| <b>Cross-linkers</b> | C-1                                      | 1,4-Divinylbenzene                                                  |
|                      | C-2                                      | <i>N,N'</i> -Methylenebisacrylamide                                 |
|                      | C-3                                      | Neopentyl glycol diacrylate                                         |
|                      | C-4                                      | Methyltrimethoxysilane                                              |
|                      | C-5                                      | 1,8-Octanediol dimethacrylate                                       |
|                      | C-6                                      | 1,6-Hexanediol dimethacrylate                                       |
|                      | C-7                                      | 1,4-Butanediol diacrylate                                           |
|                      | C-8                                      | Ethylene glycol dimethacrylate                                      |
|                      | C-9                                      | Poly(ethylene glycol) dimethacrylate                                |
|                      | C-10                                     | Poly(ethylene glycol) diacrylate                                    |
|                      | C-11                                     | Diallylamine                                                        |
|                      | C-12                                     | Formaldehyde                                                        |
|                      | C-13                                     | Glyoxal                                                             |
|                      | C-14                                     | 1,4-Bis(chloromethyl)benzene                                        |
|                      | C-15                                     | 1-Ethyl-3-methylimidazolium dicyanamide                             |
| <b>Initiators</b>    | I-1                                      | 2-Hydroxy-2-methylpropiophenone                                     |
|                      | I-2                                      | 2,2-Dimethoxy-2-phenylacetophenone                                  |
|                      | I-3                                      | 2-Methoxy-2-phenylacetophenone                                      |
|                      | I-4                                      | Diphenyl(2,4,6-trimethylbenzoyl)phosphine oxide                     |
|                      | I-5                                      | 2-Hydroxy-4'-(2-hydroxyethoxy)-2-methylpropiophenone                |
|                      | I-6                                      | 2-Benzyl-2-dimethylamino-1-(4-morpholinophenyl)-butanone-1          |
|                      | I-7                                      | 2-Hydroxy-2-methyl-1-(4-(1-methylvinyl)phenyl)propanone             |
|                      | I-8                                      | Phenylbis(2,4,6-trimethylbenzoyl)phosphine oxide                    |
|                      | I-9                                      | 1-Hydroxycyclohexyl phenyl ketone                                   |
|                      | I-10                                     | 2-Methyl-1-[4-(methylthio)phenyl]-2-(4-morpholinyl)-1-propanone     |
|                      | I-11                                     | Benzophenone                                                        |
|                      | I-12                                     | 4-(Dimethylamino)benzophenone                                       |
|                      | I-13                                     | Eosine Y/Triethanolamine                                            |
|                      | I-14                                     | Eosine/Methylene blue/Ethanolamine                                  |
|                      | I-15                                     | Azobisisobutyronitrile                                              |
|                      | I-16                                     | Hydrogen peroxide                                                   |
|                      | I-17                                     | Ammonium persulfate                                                 |
|                      | I-18                                     | Potassium persulfate                                                |
| I-19                 | Potassium persulfate/ <i>L</i> -Cysteine |                                                                     |
| I-20                 | Potassium persulfate/Sodium bisulfite    |                                                                     |
| I-21                 | Rhodium(III) chloride hydrate            |                                                                     |
| I-22                 | FeCl <sub>3</sub>                        |                                                                     |
| I-23                 | Benzoyl peroxide                         |                                                                     |
